# Supplementary material for: Persistent Cutaneous Leishmania major Infection Promotes Infection-Adapted Myelopoiesis
Source: MDPI journal article supplement (doi:10.3390/microorganisms10030535), 2022-02-28
Supplement: s1 [file s1]

|                                    |                                   |                     |                    |
|------------------------------------|-----------------------------------|---------------------|--------------------|
| Eotaxin                            | G-CSF                             | GM-CSF              | IFN- $\gamma$      |
| IL-1 $\alpha$ <sup>1</sup>         | IL-1 $\beta$                      | IL-2                | IL-3               |
| IL-4 <sup>1</sup>                  | IL-5 <sup>1</sup>                 | IL-6                | IL-7               |
| IL-9                               | IL-10                             | IL-12 p40           | IL-12 p70          |
| IL-13 <sup>1</sup>                 | IL-15                             | IL-17 <sup>1</sup>  | IP-10/CXCL10       |
| KC/                                | LIF <sup>1</sup>                  | MCP-1/CCL2          | M-CSF              |
| MIG/CXCL9                          | MIP-1 $\alpha$ /CCL3              | MIP-1 $\beta$ /CCL4 | MIP-2/CXCL2        |
| RANTES/CCL5                        | TNF- $\alpha$                     | VEGF                | 6Ckine/CCL21       |
| EPO <sup>1</sup>                   | Fractalkine/CX3CL1                | IFN- $\beta$ 1      | IL-11 <sup>1</sup> |
| IL-16                              | IL-20 <sup>1</sup>                | MCP-5/CCL12         | MDC/CCL22          |
| MIP-3 $\alpha$ /CCL20 <sup>1</sup> | MIP-3 $\beta$ /CCL19 <sup>1</sup> | TARC/CCL17          | TIMP-1             |

**Supplementary Table S2.** List of cytokines and chemokines in the multiplex assay.

<sup>1</sup> Not detected in most samples
