# Supplementary material for: Persistent Cutaneous Leishmania major Infection Promotes Infection-Adapted Myelopoiesis
Source: MDPI journal article supplement (doi:10.3390/microorganisms10030535), 2022-02-28
Supplement: s1 [file s1]

## Supplementary Figure Legends

**Supplementary Figure S1: Flow cytometry gating strategy and representative results in the infected ear dermis.** (A) Representative flow cytometry data for granulocytes (GR1<sup>hi</sup>), inflammatory monocytes (Ly6C<sup>hi</sup>CD11b<sup>+</sup>) and monocyte-derived myeloid cells (Ly6C<sup>-</sup>CD11b<sup>+</sup>) and Sca-1 expression. (B) Representative flow cytometry data for CD3ε<sup>+</sup> CD4<sup>+</sup> and CD3ε<sup>+</sup>CD8<sup>+</sup> T cell subsets. All percentages are calculated on the parent population (indicated at the top of the column).

**Supplementary Figure S2: Flow cytometry gating strategy and representative results for BM stem/progenitor cell subsets.** (A) Gating strategy and representative flow cytometry data for a naïve mouse, demonstrating the identification of Lin<sup>-</sup> Sca1<sup>+</sup> cKit<sup>+</sup> (LSK) stem/progenitor cells and their different subsets according to CD150, CD48, and CD135 expression (MPP3, MPP2, LMPP and LT-HSC) in the bone marrow. The same strategy was also used for the spleen. (B) Representative flow cytometry data for infected mice on day 1, day 7, and day 56 post-infection. All percentages are calculated on live singlets.

**Supplementary Figure S3: Flow cytometry gating strategy and representative results for myeloid cells in BM and spleen.** (A) Gating strategy and representative flow cytometry plots of naïve and infected mice (day 56), demonstrating the identification of granulocytes (GR1<sup>hi</sup>), and mature monocytes (Ly6C<sup>hi</sup>CD11b<sup>+</sup>) in the bone marrow. (B) Representative flow cytometry plots and gating strategy of naïve and infected mice (day 56), demonstrating the identification of granulocytes (GR1<sup>hi</sup>), inflammatory monocytes (Ly6C<sup>hi</sup>CD11b<sup>+</sup>), alternative monocytes (Ly6C<sup>int</sup>CD11b<sup>+</sup>), and monocyte-derived myeloid cells (Ly6C<sup>-</sup>CD11b<sup>+</sup> MHC-II<sup>+</sup>) in the spleen. All percentages are calculated on live singlets.

**Supplementary Figure S4: Flow cytometry gating strategy and representative results for red blood cells and platelets.** Gating strategy and representative flow cytometry plots of naïve and infected mice (day 56) and for platelets (CD41<sup>+</sup>) and the different stages of red blood cell differentiation (based on CD71 and Ter119 expression) in (A) the bone marrow and (B) spleen. Percentages for platelets refer to total CD45<sup>-</sup> cells, while those for erythroid cells are calculated as percentage of total erythroid cells (all four stages).

**Supplementary Figure S5: Lymphocytes in the bone marrow.** (A) The number of cells within the CD48<sup>+</sup>CD150<sup>-</sup>CD135<sup>+</sup> MPP4 subset of hematopoietic progenitor cells in bone marrow at different times post-infection. (B) Number of CD19<sup>+</sup> B lymphocytes, (C) CD4<sup>+</sup>CD3ε<sup>+</sup> T lymphocytes, and CD8<sup>+</sup>CD3ε<sup>+</sup> T lymphocytes in BM on day 56 post-infection. Graphs represent the mean ± SEM of n=13, n=11, n=11 and n=15 mice per group (*LmFn* vs *LmSd*) at 1, 7, 14 and 56 days post-infection, respectively. \* *P*<0.05 comparing infection with *LmFn* vs. *LmSd* at a given time point and † *P*<0.05 comparing infected groups (*LmFn* or *LmSd*) to naïve control mice. The results are compiled from at least 4 independent experiments for each time point. (D) Gating strategy and representative flow cytometry data for naïve and infected mice (day 56). The percentages are calculated on live singlets (CD19<sup>+</sup> cells, CD3ε<sup>+</sup> cells) or on the parent population (B and T cell subsets).

**Supplementary Figure S6: Myeloid colony-forming units in the bone marrow.** Total number of colonies (light grey, black, white) and monocytic colonies (dark grey) per 1x10<sup>4</sup> bone marrow cells isolated from naïve mice or on day 56 post-infection. Bars represent mean + SEM of four mice per group.
