# Supplementary material for: Persistent Cutaneous Leishmania major Infection Promotes Infection-Adapted Myelopoiesis
Source: MDPI journal article supplement (doi:10.3390/microorganisms10030535), 2022-02-28
Supplement: s1 [file s1]

| ANTIBODY                       | FLUOROCHROME     | CLONE        | COMPANY        |
|--------------------------------|------------------|--------------|----------------|
| CD16/32 (Fc block)             | Purified         | 2.4G2        | BD Biosciences |
| HSC staining                   |                  |              |                |
| CD117 (cKit)                   | PE               | 2B8          | BD Biosciences |
| CD135 (Flt3)                   | PerCP-eFluor 710 | A2F10        | eBioscience    |
| CD150                          | Alexa Fluor 647  | TC15-12F12.2 | BioLegend      |
| Sca1 (Ly6A/Ly6E)               | PE-Cy7           | D7           | BD Biosciences |
| CD11b                          | Biotin           | M1/70        | BD Biosciences |
| CD45R/B220                     | Biotin           | RA3-6B2      | BD Biosciences |
| GR1 (Ly6C/Ly6G)                | Biotin           | RB6-8C5      | BD Biosciences |
| Ter119                         | Biotin           | TER-119      | BD Biosciences |
| CD48                           | BV421            | HM48-1       | BD Biosciences |
| Streptavidin                   | V500             |              | BD Biosciences |
| Overview staining              |                  |              |                |
| IgM                            | PerCP-eFluor 710 | II/41        | eBioscience    |
| CD19                           | PE               | 1D3          | BD Biosciences |
| CD3e                           | PE-Cy7           | 145-2C11     | eBioscience    |
| CD11b                          | Alexa Fluor 647  | M1/70        | BD Biosciences |
| IgD                            | APC              | 11-26c.2a    | BD Biosciences |
| GR1 (Ly6C/Ly6G)                | APC-Cy7          | RB6-8C5      | BD Biosciences |
| CD4                            | APCe780          | GK1.5        | BD Biosciences |
| CD8a                           | V450             | 53-6.7       | BD Biosciences |
| CD45R/B220                     | A488             | RA3-6B2      | BD Biosciences |
| Myeloid and erythroid staining |                  |              |                |
| CD11b                          | A647             | M1/70        | BD Biosciences |

|                     |             |           |                |
|---------------------|-------------|-----------|----------------|
| Ly6G                | PECy7       | 1A8       | BD Biosciences |
| Ly6C                | PerCP-Cy5.5 | HK1.4     | eBioscience    |
| MHC Class II (I-Ab) | PE          | AF6-120.1 | BD Biosciences |
| Sca1 (Ly6A/Ly6E)    | BV711       | D7        | BD Biosciences |
| Ter119              | Biotin/FITC | TER-119   | BD Biosciences |
| Streptavidin        | FITC        |           | BD Biosciences |
| CD71                | BV421       | C2 (C2F2) | eBioscience    |
| CD41                | PE          | MWReg30   | BD Biosciences |
| CD45                | PE-CF594    | 30-F11    | BD Biosciences |

**Supplementary Table S1.** List of antibodies used for flow cytometry.
