# Supplementary material for: Persistent Cutaneous Leishmania major Infection Promotes Infection-Adapted Myelopoiesis
Source: Microorganisms. 2022 Feb 28;10(3):535. doi: 10.3390/microorganisms10030535 (PMC8954948; doi:10.3390/microorganisms10030535)
Supplement: Supplementary file 1 [file microorganisms-10-00535-s001.zip]

Archive with 9 entries (9 files):
- Figure S1.tiff
- Figure S2.tiff
- Figure S3.tiff
- Figure S4.tiff
- Figure S5.tiff
- Figure S6.tiff
- Supplementary figure legends.pdf
- Supplementary Table S1.pdf
- Supplementary Table S2.pdf
